# Supplementary material for: Decision Making under Risk in Patients Suffering from Schizophrenia or Depression
Source: MDPI journal article supplement (doi:10.3390/brainsci11091178), 2021-09-07
Supplement: s1 [file s1]

**Table S1.** Fisher's-z-transformations for the comparison of the Pearson's correlation coefficients between patients with schizophrenia (n=28) and healthy controls (n=30).

| Neuropsychological parameters                           | PAG task parameters               |          |                      |          |                                |          |
|---------------------------------------------------------|-----------------------------------|----------|----------------------|----------|--------------------------------|----------|
|                                                         | Frequency of gambles with p=0.125 |          | Total response times |          | Proportion of strategy changes |          |
|                                                         | <i>z</i>                          | <i>p</i> | <i>z</i>             | <i>p</i> | <i>z</i>                       | <i>p</i> |
| <b>CVLT</b> [correctly recalled items]                  |                                   |          |                      |          |                                |          |
| - learning (trials 1-5)                                 | 1.16                              | .246     | 1.22                 | .222     | 0.34                           | .734     |
| - immediate memory (trial 1)                            | -0.05                             | .960     | 0.73                 | .465     | 0.02                           | .984     |
| - short-delay free recall (trial 6)                     | 0.08                              | .936     | 0.08                 | .936     | -0.03                          | .976     |
| - long-delay free recall (trial 7)                      | -0.63                             | .529     | -0.27                | .787     | -0.37                          | .711     |
| - recognition corrected                                 | 0.19                              | .849     | 0.66                 | .509     | -0.51                          | .610     |
| <b>TMT</b> [sec]                                        |                                   |          |                      |          |                                |          |
| - psychomotor speed (Part A)                            | -0.87                             | .384     | 1.28                 | .200     | -1.11                          | .267     |
| - cognitive flexibility (Part B)                        | 0.69                              | .490     | 1.24                 | .215     | 1.19                           | .234     |
| <b>RWT</b> [number of produced words]                   |                                   |          |                      |          |                                |          |
| - semantic-categorical verbal fluency ("Animals"/2 min) | 0.78                              | .435     | -0.34                | .734     | 1.01                           | .312     |
| - phonological verbal fluency ("S-words"/2 min)         | 1.25                              | .211     | 1.00                 | .317     | 0.69                           | .490     |

PAG = Probability Associated Gambling Task; RT measured in msec. and ln-transformed; CVLT = California Verbal Learning Test; TMT = Trail Making Test; RWT = Regensburger word fluency test; bold values indicate significant correlations,  $p < .05$ , two-tailed.

**Table S2.** Fisher's-z-transformations for the comparison of the Pearson's correlation coefficients between patients with major depression (n=28) and healthy controls (n=30).

| Neuropsychological parameters                           | PAG task parameters               |          |                      |          |                                |          |
|---------------------------------------------------------|-----------------------------------|----------|----------------------|----------|--------------------------------|----------|
|                                                         | Frequency of gambles with p=0.125 |          | Total response times |          | Proportion of strategy changes |          |
|                                                         | <i>z</i>                          | <i>p</i> | <i>z</i>             | <i>p</i> | <i>z</i>                       | <i>p</i> |
| <b>CVLT</b> [correctly recalled items]                  |                                   |          |                      |          |                                |          |
| - learning (trials 1-5)                                 | -0.29                             | .772     | 0.55                 | .582     | 0.10                           | .920     |
| - immediate memory (trial 1)                            | 0.06                              | .952     | 1.41                 | .158     | 0.62                           | .535     |
| - short-delay free recall (trial 6)                     | -0.57                             | .569     | -0.44                | .660     | -0.12                          | .904     |
| - long-delay free recall (trial 7)                      | -0.93                             | .352     | -0.71                | .478     | -0.05                          | .960     |
| - recognition corrected                                 | 0.09                              | .928     | 0.53                 | .593     | -0.08                          | .936     |
| <b>TMT</b> [sec]                                        |                                   |          |                      |          |                                |          |
| - psychomotor speed (Part A)                            | -1.61                             | .107     | 1.73                 | .084     | -1.01                          | .312     |
| - cognitive flexibility (Part B)                        | 0.17                              | .865     | 1.54                 | .124     | 0.12                           | .904     |
| <b>RWT</b> [number of produced words]                   |                                   |          |                      |          |                                |          |
| - semantic-categorical verbal fluency ("Animals"/2 min) | 0.30                              | .764     | -0.55                | .582     | 0.41                           | .682     |
| - phonological verbal fluency ("S-words"/2 min)         | 1.22                              | .222     | 1.80                 | .072     | 0.99                           | .322     |

PAG = Probability Associated Gambling Task; RT measured in msec. and ln-transformed; CVLT = California Verbal Learning Test; TMT = Trail Making Test; RWT = Regensburger word fluency test; bold values indicate significant correlations,  $p < .05$ , two-tailed.
